# Supplementary material for: Concerted Perturbation Observed in a Hub Network in Alzheimer’s Disease
Source: PubMed Central journal article supplement (PMC3398025; doi:10.1371/journal.pone.0040498), 2012-07-16
Supplement: pone.0040498.s001.pdf [file pone.0040498.s001.pdf]

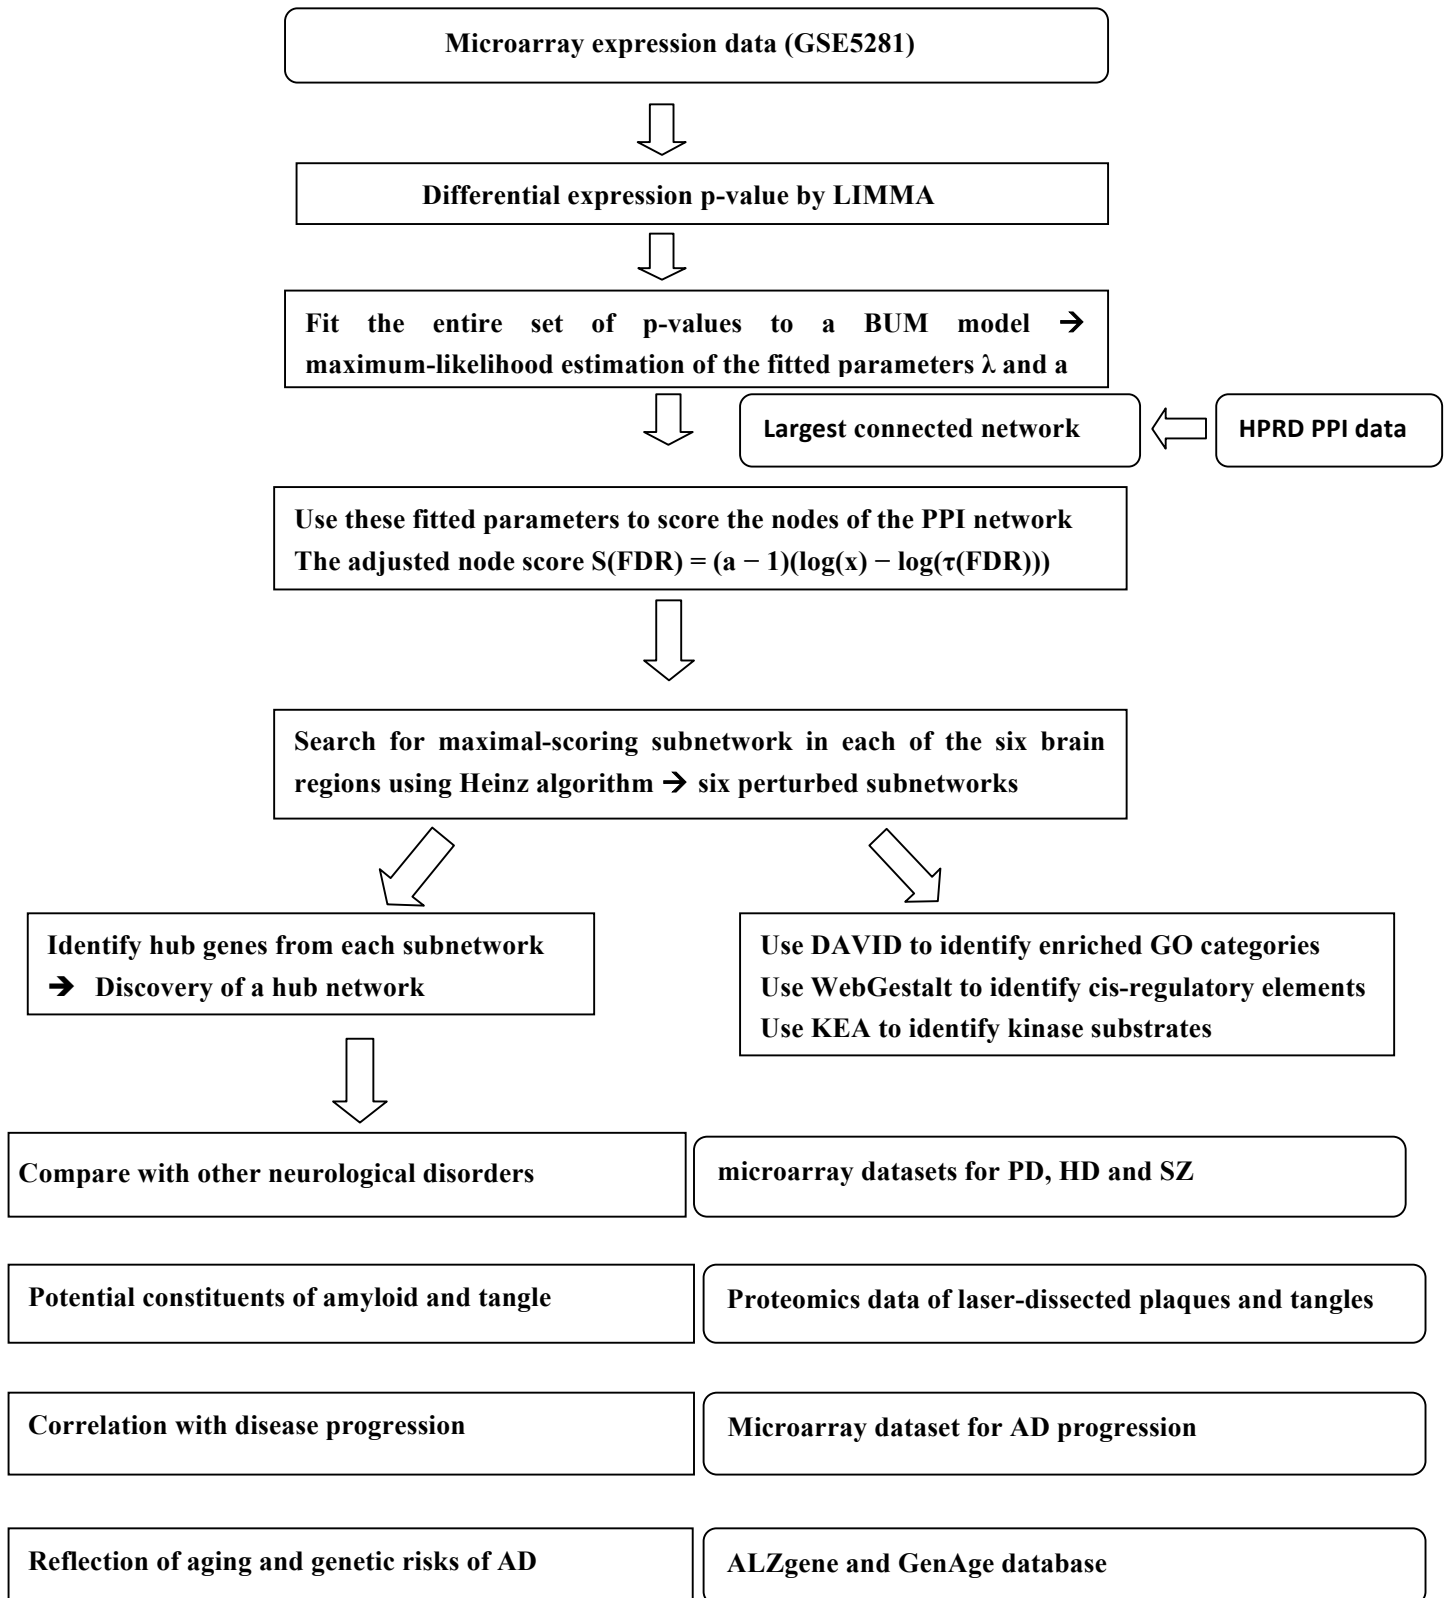

**Figure S1**
