# Supplementary material for: Concerted Perturbation Observed in a Hub Network in Alzheimer’s Disease
Source: PubMed Central journal article supplement (PMC3398025; doi:10.1371/journal.pone.0040498), 2012-07-16
Supplement: pone.0040498.s005.pdf [file pone.0040498.s005.pdf]

**Table S1.**

| <b>Transcription factor binding motif</b> | <b>Description</b>                                                                                                                                                                         | <b>Number of regions enriched</b> | <b>Brain regions enriched</b> |
|-------------------------------------------|--------------------------------------------------------------------------------------------------------------------------------------------------------------------------------------------|-----------------------------------|-------------------------------|
| CTTTGT_V\$LEF1_Q2                         | Genes with promoter regions containing the motif CTTTGT which matches annotation for LEF1: lymphoid enhancer-binding factor 1                                                              | 5                                 | EC/HIP/MTG/SFG/VCX            |
| GGGCGGR_V\$SP1_Q6                         | Genes with promoter regions containing the motif NGGGGCGGGGYN which matches annotation for SP1:Sp1 transcription factor                                                                    | 5                                 | HIP/MTG/SFG/PC/VCX            |
| GGGAGGRR_V\$MAZ_Q6                        | Genes with promoter regions containing the motif GGGAGGRR which matches annotation for MAZ: MYC-associated zinc finger protein                                                             | 4                                 | HIP/MTG/SFG/VCX               |
| GGGTGRR_V\$PAX4_Q3                        | Genes with promoter regions containing the motif GGGTGRR which matches annotation for PAX4:paired box gene 4                                                                               | 4                                 | EC/MTG/SFG/VCX                |
| RCGCANGCGY_V\$NRF1_Q6                     | Genes with promoter regions containing the motif TGACCTY which matches annotation for NRF1: nuclear respiratory factor 1                                                                   | 4                                 | EC/HIP/SFG/VCX                |
| TAATTA_V\$CHX10_Q1                        | Genes with promoter regions containing the motif TAATTA which matches annotation for VSX1: visual system homeobox 1 homolog, CHX10-like (zebrafish)                                        | 4                                 | EC/MTG/SFG/VCX                |
| V\$SRY_Q2                                 | Genes with promoter regions containing the motif NWWAACAAWANN which matches annotation for SRY:sex determining region Y                                                                    | 4                                 | HIP/MTG/SFG/VCX               |
| CAGGTG_V\$E12_Q6                          | Genes with promoter regions containing the motif CAGGTG which matches annotation for TCF3: transcription factor 3 (E2A immunoglobulin enhancer binding factors E12/E47)                    | 3                                 | EC/MTG/SFG                    |
| CATTGTYY_V\$SOX9_B1                       | Genes with promoter regions containing the motif CATTGTYY which matches annotation for SOX9: SRY (sex determining region Y)-box 9 (campomelic dysplasia, autosomal sex-reversal)           | 3                                 | HIP/MTG/SFG                   |
| GCCATNTG_V\$YY1_Q6                        | Genes with promoter regions containing the motif GGGTGRR which matches annotation for YY1:YY1 transcription factor                                                                         | 3                                 | HIP/MTG/VCX                   |
| TGACCTY_V\$ERR1_Q2                        | Genes with promoter regions containing the motif TGACCTV which matches annotation for ESRRA:estrogen-related receptor alpha                                                                | 3                                 | EC/MTG/SFG                    |
| TTGTTT_V\$FOXO4_Q1                        | Genes with promoter regions containing the motif TTGTTT which matches annotation for MLLT7: myeloid/lymphoid or mixed-lineage leukemia (trithorax homolog, Drosophila); translocated to, 7 | 3                                 | EC/MTG/SFG                    |

|                   |                                                                                                                                                         |   |             |
|-------------------|---------------------------------------------------------------------------------------------------------------------------------------------------------|---|-------------|
| V\$ARNT_02        | Genes with promoter regions containing the motif NNNNNRTCACGTGAYNNNNN which matches annotation for ARNT: aryl hydrocarbon receptor nuclear translocator | 3 | HIP/MTG/PC  |
| V\$CREB_Q4_01     | Genes with promoter regions containing the motif CNNTGACGTMA which matches annotation for CREB1: cAMP responsive element binding protein 1              | 3 | MTG/PC/VCX  |
| V\$E2F_Q6_01      | Genes with promoter regions containing the motif NKCGCGCSAAAN which matches annotation for E2F TFD1: transcription factor Dp-1                          | 3 | HIP/MTG/VCX |
| V\$HLF_01         | Genes with promoter regions containing the motif GTTACRYAAT which matches annotation for HLF: hepatic leukemia factor                                   | 3 | HIP/MTG/SFG |
| YGCANTGCR_UNKNOWN | Genes with promoter regions containing the motif YGCANTGCR. Motif does not match any known transcription factor                                         | 3 | MTG/PC/VCX  |
| CTGCAGY_UNKNOWN   | Genes with promoter regions containing the motif CTGCAGY. Motif does not match any known transcription factor                                           | 3 | EC/MTG/VCX  |
| SMTTTTGT_UNKNOWN  | Genes with promoter regions containing the motif SMTTTTGT. Motif does not match any known transcription factor                                          | 3 | EC/HIP/MTG  |
