# Supplementary material for: Concerted Perturbation Observed in a Hub Network in Alzheimer’s Disease
Source: PubMed Central journal article supplement (PMC3398025; doi:10.1371/journal.pone.0040498), 2012-07-16
Supplement: pone.0040498.s006.pdf [file pone.0040498.s006.pdf]

**Table S2.**

| <b>Kinase</b> | <b>Number of brain regions enriched</b> | <b>Brain regions enriched</b> |
|---------------|-----------------------------------------|-------------------------------|
| IKBKE         | 5                                       | EC/HIP/MTG/PC/VCX             |
| BCR           | 4                                       | EC/HIP/MTG/VCX                |
| CHUK          | 4                                       | HIP/MTG/PC/VCX                |
| IKBKB         | 4                                       | HIP/MTG/PC/VCX                |
| PRKCD         | 4                                       | HIP/MTG/SFG/VCX               |
| AKT1          | 3                                       | EC/HIP/VCX                    |
| CDK5          | 3                                       | EC/MTG/PC                     |
| CSK           | 3                                       | EC/MTG/SFG                    |
| MAP3K3        | 3                                       | HIP/PC/VCX                    |
| MAP3K7        | 3                                       | HIP/MTG/VCX                   |
| MAPK3         | 3                                       | MTG/PC/VCX                    |
| MAPK8         | 3                                       | MTG/PC/VCX                    |
| MARK4         | 3                                       | HIP/MTG/PC                    |
| PRKCZ         | 3                                       | MTG/PC/VCX                    |
| RAF1          | 3                                       | HIP/MTG/PC                    |
| RIPK1         | 3                                       | HIP/MTG/PC                    |
| RIPK2         | 3                                       | HIP/MTG/PC                    |
| RIPK3         | 3                                       | HIP/MTG/PC                    |
