# Supplementary material for: Concerted Perturbation Observed in a Hub Network in Alzheimer’s Disease
Source: PubMed Central journal article supplement (PMC3398025; doi:10.1371/journal.pone.0040498), 2012-07-16
Supplement: pone.0040498.s007.pdf [file pone.0040498.s007.pdf]

**Table S3.**

| <b>Dataset_Disease_Region</b>                                   | <b>Number of genes detected</b> | <b>P-value</b>  |
|-----------------------------------------------------------------|---------------------------------|-----------------|
| GSE12654_SZ_prefontal_BA10                                      | 110                             | 0.382           |
| GSE17612_SZ_prefontal_BA10                                      | 129                             | 0.423           |
| GSE20168_PD_prefontal_BA9                                       | 123                             | 0.0837          |
| GSE20291_PD_putamen                                             | 122                             | 0.356           |
| GSE20292_PD_substantia nigra                                    | 120                             | 0.214           |
| GSE7621_PD_substantia nigra                                     | 134                             | 0.253           |
| GSE3790_HD_prefontal_BA4                                        | 126                             | 0.0725          |
| GSE3790_HD_prefontal_BA9                                        | 127                             | 0.561           |
| GSE3790_HD_cerebellum                                           | 125                             | 0.206           |
| GSE5281_AD_EC                                                   | 130                             | <b>0.0191</b>   |
| GSE5281_AD_HIP                                                  | 133                             | <b>0.00547</b>  |
| GSE5281_AD_MTG                                                  | 134                             | <b>0.00111</b>  |
| GSE5281_AD_PC                                                   | 134                             | <b>0.0121</b>   |
| GSE5281_AD_SFG                                                  | 135                             | <b>0.0312</b>   |
| GSE5281_AD_VCX                                                  | 134                             | 0.0606          |
| GSE15222_AD_cortex<br>(frontal, temporal, parietal, cerebellar) | 115                             | <b>2.58E-05</b> |
