# Supplementary material for: Concerted Perturbation Observed in a Hub Network in Alzheimer’s Disease
Source: PubMed Central journal article supplement (PMC3398025; doi:10.1371/journal.pone.0040498), 2012-07-16
Supplement: pone.0040498.s008.pdf [file pone.0040498.s008.pdf]

**Table S4.**

| <b>plaque</b> | <b>tangle</b> |
|---------------|---------------|
| <b>SNCA</b>   | <b>SNCA</b>   |
| <b>ACTB</b>   | <b>ACTB</b>   |
| <b>MAPK1</b>  | <b>MAPK1</b>  |
| <b>MAPT</b>   | <b>MAPT</b>   |
| <b>HSPA8</b>  | <b>HSPA8</b>  |
| <b>HNRNPK</b> | <b>HNRNPK</b> |
| <b>GAPDH</b>  | <b>GAPDH</b>  |
| <b>EEF1A1</b> | <b>EEF1A1</b> |
| <b>DNM1</b>   | <b>DNM1</b>   |
| <b>CLTC</b>   | <b>CLTC</b>   |
| <b>TUBA4A</b> | <b>TUBA4A</b> |
| CDC42         | TUBB          |
| DYNLL1        | UBC           |
| YWHAZ         |               |
| YWHAH         |               |
| YWHAG         |               |
| YWHAB         |               |
| SNAP25        |               |
| RTN4          |               |
| MAP2K1        |               |
| PRKCA         |               |
| PEBP1         |               |
| APP           |               |
| HSP90AA1      |               |
| HSPA1A        |               |
| XRCC6         |               |
| FLNA          |               |
| DLG4          |               |
| YWHAQ         |               |
| CRMP1         |               |
| PCBP1         |               |
