# Supplementary material for: Concerted Perturbation Observed in a Hub Network in Alzheimer’s Disease
Source: PubMed Central journal article supplement (PMC3398025; doi:10.1371/journal.pone.0040498), 2012-07-16
Supplement: pone.0040498.s009.pdf [file pone.0040498.s009.pdf]

**Table S5.**

| <i>Gene symbol</i> | <i>MMSE_cor</i> | <i>Gene symbol</i> | <i>NFT_cor</i> |
|--------------------|-----------------|--------------------|----------------|
| <b>FOXO1</b>       | 0               | <b>KPNB1</b>       | 0              |
| <b>ITGB5</b>       | 0               | <b>FOXO1</b>       | 8.00E-04       |
| <b>CLTC</b>        | 5.00E-04        | <b>ITGB5</b>       | 0.0013         |
| <b>YWHAZ</b>       | 9.00E-04        | <b>CSK</b>         | 0.0014         |
| <b>EP300</b>       | -9.00E-04       | EEF1A1             | 0.0016         |
| <b>NFKBIA</b>      | -0.0011         | <b>FLNA</b>        | 0.0016         |
| <b>KPNB1</b>       | -0.0012         | <b>CCNH</b>        | -0.0017        |
| <b>CRMP1</b>       | 0.0014          | <b>CREBBP</b>      | 0.002          |
| <b>EWSR1</b>       | -0.0015         | <b>MAPK1</b>       | 0.0028         |
| <b>FLNA</b>        | -0.0016         | COPS5              | -0.0029        |
| <b>PPP2CA</b>      | 0.0017          | <b>CRMP1</b>       | -0.0033        |
| <b>PRKCB</b>       | 0.002           | RTN4               | -0.0035        |
| <b>APP</b>         | -0.0024         | <b>CLTC</b>        | -0.0037        |
| <b>CSNK2A1</b>     | 0.0028          | <b>TDG</b>         | 0.0043         |
| <b>CDC42</b>       | 0.0029          | <b>HSPA8</b>       | -0.0044        |
| <b>TUBB</b>        | 0.0031          | <b>DYNLL1</b>      | -0.0047        |
| <b>PARD3</b>       | -0.0031         | <b>GAPDH</b>       | -0.0047        |
| <b>RPS6KA5</b>     | -0.0032         | <b>YWHAZ</b>       | -0.0053        |
| EGFR               | -0.0047         | <b>NFKBIA</b>      | 0.0057         |
| <b>DYNLL1</b>      | 0.0048          | <b>APP</b>         | 0.0065         |
| <b>YWHAH</b>       | 0.0059          | UBC                | -0.0071        |
| SUMO1              | 0.0082          | TSG101             | -0.0079        |
| <b>MAPK1</b>       | -0.0084         | <b>SMAD5</b>       | 0.0081         |
| <b>PTN</b>         | 0.0092          | <b>EP300</b>       | 0.0097         |
| SMAD4              | -0.0096         | BRCA1              | 0.0108         |
| <b>YWHAB</b>       | 0.0099          | <b>SNAP25</b>      | -0.0109        |
| <b>CSK</b>         | -0.01           | <b>PTN</b>         | -0.0116        |
| <b>SNAP25</b>      | 0.0105          | <b>PARD3</b>       | 0.0117         |
| <b>CREBBP</b>      | -0.0115         | <b>JUN</b>         | 0.0123         |
| ATXN1              | 0.0133          | <b>FN1</b>         | -0.0149        |
| <b>TDG</b>         | -0.0134         | PSMD11             | -0.0151        |
| <b>GAPDH</b>       | 0.0148          | <b>PRKCB</b>       | -0.0164        |
| <b>CDK5</b>        | 0.015           | <b>FYN</b>         | 0.0168         |
| <b>TNFRSF1A</b>    | -0.0163         | <b>YWHAH</b>       | -0.0183        |
| <b>HDAC1</b>       | -0.0168         | <b>EWSR1</b>       | 0.0184         |
| <b>APEX1</b>       | 0.0185          | EEF1G              | 0.0189         |
| HSP90AA1           | -0.0187         | <b>APEX1</b>       | -0.0207        |

|                |         |                 |         |
|----------------|---------|-----------------|---------|
| <b>MAP3K14</b> | -0.0191 | <b>TNFRSF1A</b> | 0.0207  |
| CDK2           | -0.0196 | PDGFRB          | 0.0221  |
| <b>CCNH</b>    | 0.0205  | <b>CSNK2A1</b>  | -0.0231 |
| <b>HNRNPK</b>  | 0.0232  | <b>PXN</b>      | 0.0233  |
| SNCA           | 0.0248  | STAT1           | -0.0238 |
| SMAD1          | -0.0262 | <b>EIF5</b>     | -0.0247 |
| <b>FN1</b>     | 0.0274  | PEBP1           | 0.025   |
| <b>HSPA8</b>   | 0.0283  | <b>TUBB</b>     | -0.0254 |
| <b>FYN</b>     | -0.0301 | <b>HNRNPK</b>   | -0.0275 |
| U2AF2          | -0.0317 | GSK3B           | 0.0279  |
| CALM1          | 0.0328  | <b>CDK5</b>     | -0.0323 |
| <b>SMAD5</b>   | -0.0343 | <b>PPP2CA</b>   | -0.0338 |
| KAT2B          | -0.0359 | <b>MAP3K14</b>  | 0.034   |
| <b>PXN</b>     | -0.0361 | PCNA            | -0.0342 |
| SHC1           | -0.0371 | <b>YWHAB</b>    | -0.036  |
| <b>PTMA</b>    | -0.0372 | <b>HDAC1</b>    | 0.0383  |
| <b>EIF5</b>    | 0.0418  | <b>RPS6KA5</b>  | 0.0388  |
| MAP2K1         | 0.0425  | <b>CDC42</b>    | -0.0403 |
| <b>JUN</b>     | -0.0462 | CTBP1           | 0.0411  |
| GSK3B          | -0.0703 | <b>PTMA</b>     | 0.0417  |
| PDGFRB         | -0.0721 | MCM7            | 0.0461  |
| BRCA1          | -0.0747 | RGS2            | -0.0462 |
| RTN4           | 0.0758  | SMAD1           | 0.0589  |
| EEF1A1         | -0.0986 | SUMO1           | -0.0602 |
| COPS5          | 0.1119  | MAP2K1          | -0.0653 |
| PEBP1          | -0.1139 | CALM1           | -0.0799 |
| TSG101         | 0.1476  | ATXN1           | -0.0856 |
| UBC            | 0.154   | SNCA            | -0.1254 |
| STAT1          | 0.1728  | HSP90AA1        | 0.1638  |
| PSMD11         | 0.236   | U2AF2           | 0.1736  |
| MCM7           | -0.2606 | SHC1            | 0.2562  |
| CTBP1          | -0.302  | EGFR            | 0.2659  |
| PCNA           | 0.3086  | KAT2B           | 0.6531  |
| RGS2           | 0.3204  | CDK2            | 0.7921  |
| EEF1G          | -0.5812 | SMAD4           | -0.7954 |
