# Supplementary material for: Concerted Perturbation Observed in a Hub Network in Alzheimer’s Disease
Source: PubMed Central journal article supplement (PMC3398025; doi:10.1371/journal.pone.0040498), 2012-07-16
Supplement: pone.0040498.s010.pdf [file pone.0040498.s010.pdf]

**Table S6.**

|                   |                     |
|-------------------|---------------------|
| <b><i>ALZ</i></b> | <b><i>AGING</i></b> |
| <b>YWHAZ</b>      | <b>YWHAZ</b>        |
| <b>UBE2I</b>      | <b>UBE2I</b>        |
| <b>PIK3R1</b>     | <b>PIK3R1</b>       |
| <b>NFKBIA</b>     | <b>NFKBIA</b>       |
| <b>MAPT</b>       | <b>MAPT</b>         |
| <b>LRP2</b>       | <b>LRP2</b>         |
| <b>AR</b>         | <b>AR</b>           |
| <b>IRS1</b>       | <b>IRS1</b>         |
| <b>APP</b>        | <b>APP</b>          |
| <b>HSPA1A</b>     | <b>HSPA1A</b>       |
| <b>GSK3B</b>      | <b>GSK3B</b>        |
| <b>NR3C1</b>      | <b>NR3C1</b>        |
| <b>ESR1</b>       | <b>ESR1</b>         |
| <b>APEX1</b>      | <b>APEX1</b>        |
| BAG3              | CDC42               |
| CASP8             | SUMO1               |
| SOS2              | STAT3               |
| SNCA              | BRCA1               |
| ATXN1             | SHC1                |
| PLCG1             | RB1                 |
| SMAD3             | MAPK3               |
| GAPDH             | PRKDC               |
| FYN               | PRKCA               |
| TUBB              | PDGFRB              |
| CSK               | PCNA                |
| CDK5              | JUN                 |
| TNFRSF1A          | HSP90AA1            |
|                   | HSPA8               |
|                   | HMGB1               |
|                   | HDAC1               |
|                   | HTT                 |
|                   | XRCC6               |
|                   | FOXO1               |
|                   | AKT1                |
|                   | EP300               |
|                   | EGFR                |
|                   | EEF1A1              |

|  |        |
|--|--------|
|  | CREBBP |
|  | CEBPB  |
|  | PTPN11 |
