# Supplementary material for: Concerted Perturbation Observed in a Hub Network in Alzheimer’s Disease
Source: PubMed Central journal article supplement (PMC3398025; doi:10.1371/journal.pone.0040498), 2012-07-16
Supplement: pone.0040498.s012.pdf [file pone.0040498.s012.pdf]

**Table S8.**

|                                         | <i><b>This work</b></i>                                                                             | <i><b>Previous work by Liu et. al.</b></i>                             |
|-----------------------------------------|-----------------------------------------------------------------------------------------------------|------------------------------------------------------------------------|
| <b>Perturbed subnetwork</b>             | <i>De novo</i> discovery from human interactome                                                     | Discovery from pre-built network for AD                                |
| <b>Algorithm</b>                        | Noise reduction (BUM model) and exact solution of MSS                                               | Differential expression and co-expression                              |
| <b>Evidence of biological relevance</b> | Disease progression<br>Genetic risk and aging<br>Amyloid/tangle constituents<br>Robust and specific | Not provided                                                           |
| <b>Specific state of neuron</b>         | aging<br>“healthy” neurons in AD<br>late-stage AD                                                   | Non-discriminative pathological condition                              |
| <b>Data mining</b>                      | Efforts on the manual integration and synthesis of literatures and knowledge                        | Focused on the explanation of active pathways underlying KEGG AD genes |
| <b>Disease mechanism</b>                | adaptation strategy<br>formation of amyloid and NFT                                                 | formation of amyloid and NFT.                                          |
